# Supplementary material for: A copper metal–organic framework-based electrochemical sensor for identification of glutathione in pharmaceutical samples
Source: Royal Society of Chemistry journal article supplement (doi:10.1039/d3an01714a), 2023-12-19
Supplement: d3an01714a1.pdf [file d3an01714a1.pdf]

## Supporting Information

### A Copper Metal-Organic Framework-based Electrochemical Sensor for Identification of Glutathione in Pharmaceutical Samples

Reshma Kaimal,<sup>a,1</sup> Aashutosh Dube,<sup>a,1</sup> Abdullah Al Souwaileh,<sup>b</sup> Jerry J Wu,<sup>c</sup> Sambandam Anandan,<sup>a,\*</sup>

<sup>a</sup>*Nanomaterials & Solar Energy Conversion Lab, Department of Chemistry, National Institute of Technology, Tiruchirappalli -620015, India. E-mail: [sanand@nitt.edu](mailto:sanand@nitt.edu)*

<sup>b</sup>*Department of Chemistry, College of Science, King Saud University, Riyadh 11451, Saudi Arabia.*

<sup>c</sup>*Department of Environmental Engineering & Science, Feng Chia University, Taichung-407, Taiwan.*

<sup>1</sup> Equally Contribute

| Sl. No. | Contents                                                                                                                                                                                                                                                                                                                                                                                                                                                 | Page no. |
|---------|----------------------------------------------------------------------------------------------------------------------------------------------------------------------------------------------------------------------------------------------------------------------------------------------------------------------------------------------------------------------------------------------------------------------------------------------------------|----------|
| 1       | <b>Table S1</b> Comparison of detection limit using CuMOF/GCE electrode to various modified electrodes using the voltammetric method previously reported in the literature.                                                                                                                                                                                                                                                                              | 2        |
| 2       | <b>Figure S1</b> (A) Reproducibility of the different CuMOF electrodes used in the detection of 0.5 mmol/L GSH in 0.1 mol/L PBS solution (pH 7.0). (B) Stability of the prepared CuMOF electrode (kept at a temperature of 40°C) used in the detection of 0.5 mmol/L GSH in PBS solution (0.1 mol/L pH 7.0) over 5 weeks. (C) Repeatability of the prepared CuMOF electrodes used in the detection of 0.5 mmol/L GSH in 0.1 mol/L PBS solution (pH 7.0). | 2        |
| 3       | <b>Table S2</b> Determination of GSH levels in real samples GSH commercial tablets using the CuMOF modified electrode (n = 3)                                                                                                                                                                                                                                                                                                                            | 3        |

**Table S1** Comparison of detection limit using CuMOF/GCE electrode to various modified electrodes using the voltammetric method previously reported in the literature.

| <b>Electrodes</b>       | <b>Dynamic Range<br/>(<math>\mu\text{mol/L}</math>)</b> | <b>Limit of<br/>Detection<br/>(<math>\mu\text{mol/L}</math>)</b> | <b>References</b> |
|-------------------------|---------------------------------------------------------|------------------------------------------------------------------|-------------------|
| <b>pCAF/GCE</b>         | 0.3 $\mu\text{M}$ - 100 $\mu\text{M}$                   | 2.2 $\mu\text{M}$                                                | [1]               |
| <b>N-GR/CoPc/GCE</b>    | 1 $\mu\text{M}$ – 8 mM                                  | 1 $\mu\text{M}$                                                  | [2]               |
| <b>Cu-CoHCF/GCE</b>     | 5 $\mu\text{M}$ - 90 $\mu\text{M}$                      | 2.5 $\mu\text{M}$                                                | [3]               |
| <b>MPT/HP-b-CD/ GCE</b> | 1 $\mu\text{M}$ - 580 $\mu\text{M}$                     | 0.287 $\mu\text{M}$                                              | [4]               |
| <b>SWNTs/GCE</b>        | 5 $\mu\text{M}$ - 100 $\mu\text{M}$                     | 0.5 $\mu\text{M}$                                                | [5]               |
| <b>CuMOF/GCE</b>        | 0.1 $\mu\text{M}$ – 20 $\mu\text{M}$                    | 0.1 $\mu\text{M}$                                                | This Work         |

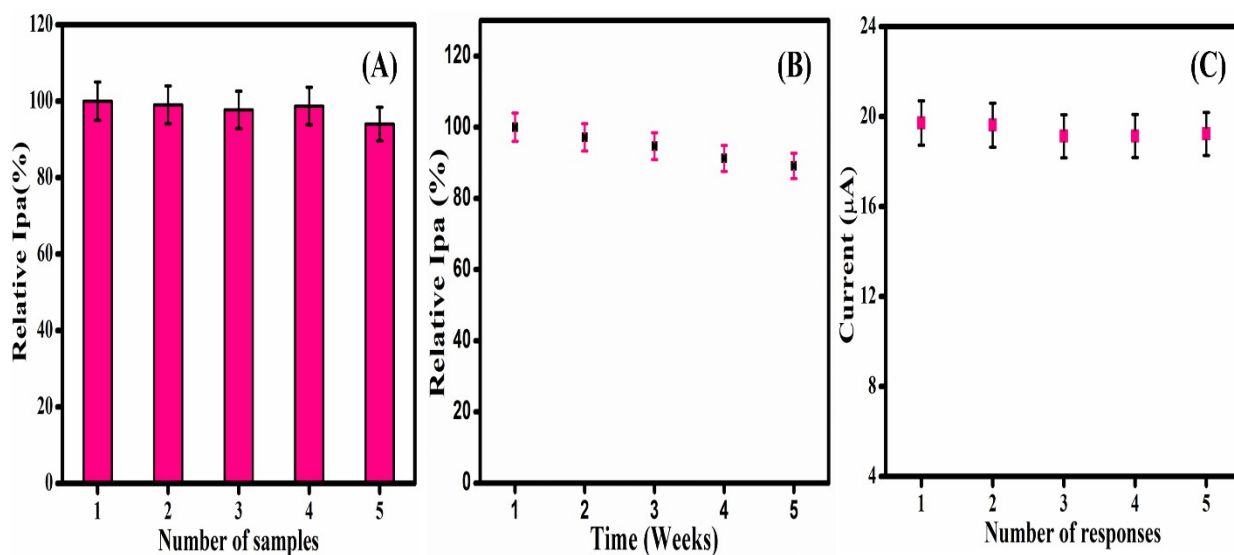

**Figure S1** (A) Reproducibility of the different CuMOF electrodes used in the detection of 0.5 mmol/L GSH in 0.1 mol/L PBS solution (pH 7.0). (B) Stability of the prepared CuMOF electrode (kept at a temperature of 4°C) used in the detection of 0.5 mmol/L GSH in PBS solution (0.1 mol/L pH 7.0) over 5 weeks. (C) Repeatability of the prepared CuMOF electrodes used in the detection of 0.5 mmol/L GSH in 0.1 mol/L PBS solution (pH 7.0).

**Table S2** Determination of GSH levels in real samples GSH commercial tablets using the CuMOF modified electrode (n = 3)

| <b>Samples</b>                                  | <b>Added<br/>(<math>\mu\text{mol/L}</math>)</b> | <b>Original<br/>(<math>\mu\text{mol/L}</math>)</b> | <b>Found<br/>(<math>\mu\text{mol/L}</math>)</b> | <b>Recovery<br/>(%)</b> |
|-------------------------------------------------|-------------------------------------------------|----------------------------------------------------|-------------------------------------------------|-------------------------|
|                                                 | -                                               | 100                                                | 98 $\pm$ 1.1                                    | 98.2                    |
|                                                 | 100                                             | 200                                                | 199 $\pm$ 2.3                                   | 99.7                    |
| <b>GSH Tablets<br/>(Labeled: 500<br/>mg/mL)</b> | 100                                             | 300                                                | 302 $\pm$ 1.5                                   | 100.8                   |
|                                                 | 100                                             | 400                                                | 401 $\pm$ 1.2                                   | 100.3                   |

## REFERENCES

- [1] P.T. Lee, R.G. Compton, Electrochemical detection of NADH, cysteine, or glutathione using a caffeic acid modified glassy carbon electrode, *Electroanalysis*. 25 (2013) 1613–1620.
- [2] H. Xu, J. Xiao, B. Liu, S. Griveau, F. Bedioui, Enhanced electrochemical sensing of thiols based on cobalt phthalocyanine immobilized on nitrogen-doped graphene, *Biosens. Bioelectron.* 66 (2015) 438–444.
- [3] V.V. Sharma, L. Guadagnini, M. Giorgetti, D. Tonelli, Electrocatalytic determination of thiols using hybrid copper cobalt hexacyanoferrate modified glassy carbon electrode, *Sensors Actuators B Chem.* 228 (2016) 16–24.
- [4] X. Li, L. Zheng, Y. Wang, N. Zhang, Y. Lou, T. Xiao, J. Liu, A novel electrocatalyst with high sensitivity in detecting glutathione reduced by 2-hydroxypropyl- $\beta$ -cyclodextrin enveloped 10-methylphenothiazine, *RSC Adv.* 5 (2015) 71749–71755.
- [5] L. Zhao, L. Zhao, Y. Miao, C. Zhang, Selective electrochemical determination of glutathione from the leakage of intracellular GSH contents in HeLa cells following doxorubicin-induced cell apoptosis, *Electrochim. Acta.* 206 (2016) 86–98.
